## Reduced Susceptibility to Vancomycin Influences Pathogenicity in *Staphylococcus aureus* Infection

Anton Y. Peleg,<sup>1,2,3</sup> Divya Monga,<sup>2</sup> Satish Pillai,<sup>1,3</sup> Eleftherios Mylonakis,<sup>2,3</sup> Robert C. Moellering, Jr.,<sup>1,3</sup> and George M. Eliopoulos<sup>1,3</sup>

Division of Infectious Diseases, <sup>1</sup>Beth Israel Deaconess Medical Center, <sup>2</sup>Massachusetts General Hospital, and <sup>3</sup>Harvard Medical School, Boston

**In the present study, we demonstrated the utility of the non-mammalian model system *Galleria mellonella* for studying the pathogenesis of *Staphylococcus aureus* infection. By use of clinical and laboratory strains that had been exposed to vancomycin, we showed that both *agr* functional status and vancomycin minimum inhibitory concentration are determinants associated with the virulence of *S. aureus* in *G. mellonella*. These results show that *G. mellonella* can be effectively used to facilitate the in vivo study of *S. aureus* virulence and, more specifically, the relationship between antibiotic drug resistance and the pathogenesis of infection.**

The emergence of methicillin-resistant *Staphylococcus aureus* (MRSA) in both the hospital and community setting is concerning and has led to necessary changes in the empirical prescribing of antibiotics in health care institutions worldwide. In most institutions, vancomycin remains the first-line antibiotic for MRSA infection. Not surprisingly, staphylococcal strains with reduced susceptibility to vancomycin are increasingly being reported. To date, frank resistance to vancomycin is rare; however,

true intermediate resistance (MIC  $\geq 4$   $\mu\text{g}/\text{mL}$ ; vancomycin-intermediate *S. aureus* [VISA]) and vancomycin heteroresistance (heteroresistant VISA [hVISA]) are encountered [1–4].

Serious infections caused by hVISA/VISA strains are associated with poor clinical outcomes [1, 5]. However, these outcomes are confounded by the inherent nature of hVISA/VISA infections, which are often associated with prosthetic material, deep-seated abscesses, and endocarditis [1, 5]. Surprisingly, such patients can have very prolonged periods of bacteremia (up to 87 days has been reported) [5] without acute clinical instability. Moreover, patients with staphylococcal bacteremia have been shown to be significantly less likely to suffer shock as the vancomycin MIC increases from 1 to 2  $\mu\text{g}/\text{mL}$  [6]. Thus, an interrelationship between staphylococcal susceptibility to vancomycin and pathogenicity is plausible. In support of that hypothesis, dysfunction of an important global virulence regulator in *S. aureus*, the accessory gene regulator (*agr*), has been associated with the emergence of the hVISA/VISA phenotype [4, 7], thus highlighting the potential interaction between virulence and susceptibility to vancomycin.

In the present study, we used the nonmammalian model system *Galleria mellonella* to identify the pathogenic consequences of reduced vancomycin susceptibility in *S. aureus* infection. *G. mellonella* is a wax moth that has been used to study host-pathogen interactions for a range of organisms, including *Pseudomonas aeruginosa*, *Burkholderia cepacia*, *Proteus mirabilis*, *Bacillus cereus*, *Francisella tularensis*, and several pathogenic fungi [8–10]. Importantly, a correlation has been established between the virulence of an organism in *G. mellonella* and that in mammalian models [9, 10]. Finally, the *G. mellonella* model is well suited to the study of human pathogens, because it can be maintained at temperatures of 37°C. Thus, we studied the utility of the *G. mellonella* model for assessing the virulence of *S. aureus* and, in particular, the pathogenic consequences of reduced susceptibility to vancomycin.

**Methods.** The bacterial strains used in this study are shown in table 1. Susceptibility to vancomycin was determined previously by agar dilution, according to Clinical and Laboratory Standards Institute guidelines. All isolates within each series were indistinguishable by pulsed-field gel electrophoresis [4]. RN6607 is a methicillin-susceptible, *agr* group II prototype *S. aureus* strain, and RN9120 is its isogenic *agr* knockout mutant [11]. The in vitro passage of strains on vancomycin, described elsewhere [7], gave rise to RN6607V, RN9120V, and RN9120-VISA (table 1). The *agr* function was determined by  $\delta$ -hemolysin activity, as reported elsewhere [4]. For growth kinetic experi-

Received 12 July 2008; accepted 15 September 2008; electronically published 6 January 2009.

Potential conflicts of interest: G.M.E. has served as a consultant for and has received research funding support from Cubist Pharmaceuticals and Pfizer; R.C.M. has served as consultant for Pfizer, Cubist, and Wyeth and has received research funding support from Cubist Pharmaceuticals; E.M. has served as a consultant for Biogen Idec, has received research support from Astellas Pharma, and is a member of the speakers' bureau for Pfizer. All other authors report no potential conflicts.

Financial support: National Institutes of Health (K08 award A163084 to E.M.); Ellison Medical Foundation (New Scholar Award in Global Infectious Diseases to E.M.). This work was supported through a research grant from Cubist Pharmaceuticals (grant to G.M.E.).

Reprints or correspondence: Dr. Anton Peleg, Div. of Infectious Diseases, Beth Israel Deaconess Medical Center, 110 Francis St., LMOB suite GB, Boston, MA 02215 (apeleg@bidmc.harvard.edu).

The Journal of Infectious Diseases 2009; 199:532–6

© 2009 by the Infectious Diseases Society of America. All rights reserved.

0022-1899/2009/19904-0009\$15.00

DOI: 10.1086/596511

**Table 1. Bacterial strains used in this study with their respective clinical sites of isolation, vancomycin MICs, and accessory gene regulator (*agr*) function.**

| Strain                             | Site of isolation              | Vancomycin MIC, $\mu\text{g}/\text{mL}$ | <i>agr</i> function <sup>a</sup> |
|------------------------------------|--------------------------------|-----------------------------------------|----------------------------------|
| <b>Clinical pairs</b>              |                                |                                         |                                  |
| Pair 1                             |                                |                                         |                                  |
| A8090 <sup>b</sup> (MRSA)          | Blood                          | 1                                       | –                                |
| A8094                              |                                | 8                                       | –                                |
| Pair 2                             |                                |                                         |                                  |
| A9635 (MSSA)                       | Blood                          | 1                                       | –                                |
| A9639                              |                                | 4                                       | –                                |
| Pair 3                             |                                |                                         |                                  |
| A5937 (MRSA)                       | Blood and porcine aortic valve | 1                                       | +                                |
| A5940                              |                                | 2                                       | –                                |
| Pair 3                             |                                |                                         |                                  |
| A6224                              | Blood                          | 2                                       | –                                |
| A6226                              |                                | 3                                       | –                                |
| <b>Laboratory strains</b>          |                                |                                         |                                  |
| <i>agr</i> <sup>+</sup> pair       |                                |                                         |                                  |
| RN6607 ( <i>agr</i> <sup>+</sup> ) | ...                            | 1                                       | +                                |
| RN6607V                            |                                | 2                                       | +                                |
| <i>agr</i> <sup>–</sup> series     |                                |                                         |                                  |
| RN9120 ( <i>agr</i> <sup>–</sup> ) | ...                            | 1                                       | –                                |
| RN9120V                            |                                | 2                                       | –                                |
| RN9120-VISA                        |                                | 8                                       | –                                |
| ATCC strain 29213                  | ...                            | 1                                       | ...                              |

**NOTE.** MRSA, methicillin-resistant *Staphylococcus aureus*; MSSA, methicillin-sensitive *S. aureus*.

<sup>a</sup> Function as determined by  $\delta$ -hemolysin activity [4].

<sup>b</sup> A8090 and A8094 correspond to the published and sequenced strains JH1 and JH9, respectively [3].

ments, an overnight culture was diluted 1:1000 in 200  $\mu\text{L}$  of brain-heart infusion broth in the wells of a 96-well plate and incubated at 37°C. Eight replicate wells were used for each strain, and optical density at 600 nm (OD<sub>600</sub>) was recorded for 24 h. Growth kinetic experiments were performed twice.

For the *G. mellonella* killing assays, caterpillars in the final instar larval stage (Vanderhorst) were stored in the dark and used within 7 days after shipment. Caterpillars 250–350 mg in weight were used in all assays. Sixteen randomly chosen caterpillars were used for each group in an experiment. Before inoculation into *G. mellonella*, bacterial cells were washed with PBS and then diluted to an appropriate cell density, as determined by OD<sub>600</sub>. A 10- $\mu\text{L}$  Hamilton syringe was used to inject 10- $\mu\text{L}$  aliquots of the inoculum into the hemocoel of each caterpillar via the last left proleg (figure 1) [9]. Bacterial colony counts on Luria-Bertani agar were used to confirm all inocula. After injection, caterpillars were incubated in plastic containers, and the number of dead caterpillars was scored daily. Caterpillars were considered dead when they displayed no movement in response to touch.

For all experiments, 2 control groups were used. The first group included caterpillars that were inoculated with PBS to monitor for killing due to physical trauma, and the second group included caterpillars that received no injection. Experiments that had >2 dead caterpillars in either control group were discarded and repeated. For simplicity, the control groups are not included in the figures. Survival curves were plotted using the Kaplan-Meier method, and differences in survival were calculated using the log-rank test (Stata software; version 6). Differences were considered statistically significant at  $P < .05$ . At least 3 independent experiments were performed for all *G. mellonella* killing experiments. Representative experiments are presented.

**Results.** As shown in figure 2A, inoculation of *G. mellonella* with a reference strain of *S. aureus* (ATCC 29213) resulted in rapid killing of the caterpillars. Killing was significantly dependent on the number of *S. aureus* cells injected (figure 2A) as well as the incubation temperature after inoculation. The rate of killing was slower at 30°C (figure 2B) than at 37°C (figure 2A). Thus, for further experiments we used inocula of  $1 \times 10^5$ – $1 \times 10^6$  cfu/larva and incubated the infected *G. mellonella* at 37°C. To evaluate whether *G. mellonella* killing was caused by a noninfectious reaction, such as that due to staphylococcal cell wall components, we determined the survival of caterpillars after injection of heat-killed *S. aureus*. No killing was observed in this group (data not shown). Melanization is also part of the infection process in insects [8], and during the course of *S. aureus* infection caterpillars demonstrated obvious signs of melanization (figure 2C and 2D).

To confirm the utility of *G. mellonella* as a model to study the virulence of *S. aureus*, we assessed the effects of dysfunction in the global virulence regulator *agr* on killing by staphylococci in *G. mellonella*. This virulence regulator has been shown to be important in a range of hosts, including mammals [12]. As shown in figure 2E, infection with an *agr* knockout mutant (RN9120) caused significantly less killing than its *agr*<sup>+</sup> parent strain (RN6607) ( $P < .01$ ), thus highlighting the importance of this virulence regulator in the pathogenesis of *S. aureus* infection in *G. mellonella*. The growth kinetics of these isogenic strains were comparable (figure 2F).

To assess the pathogenic consequences of reduced susceptibility to vancomycin in *S. aureus*, we used a carefully selected sample of isogenic clinical pairs of strains from patients who had been exposed to vancomycin (table 1). All pairs demonstrated the same pattern, whereby the strain with the elevated vancomycin MIC was significantly less virulent than its vancomycin-susceptible progenitor when injected at a similar inoculum into *G. mellonella* (figure 2G and 2H). Interestingly, the degree of

The figure is available in its entirety in the online edition of the *Journal of Infectious Diseases*.

**Figure 1.** Inoculation of *Galleria mellonella* caterpillars with *Staphylococcus aureus*.

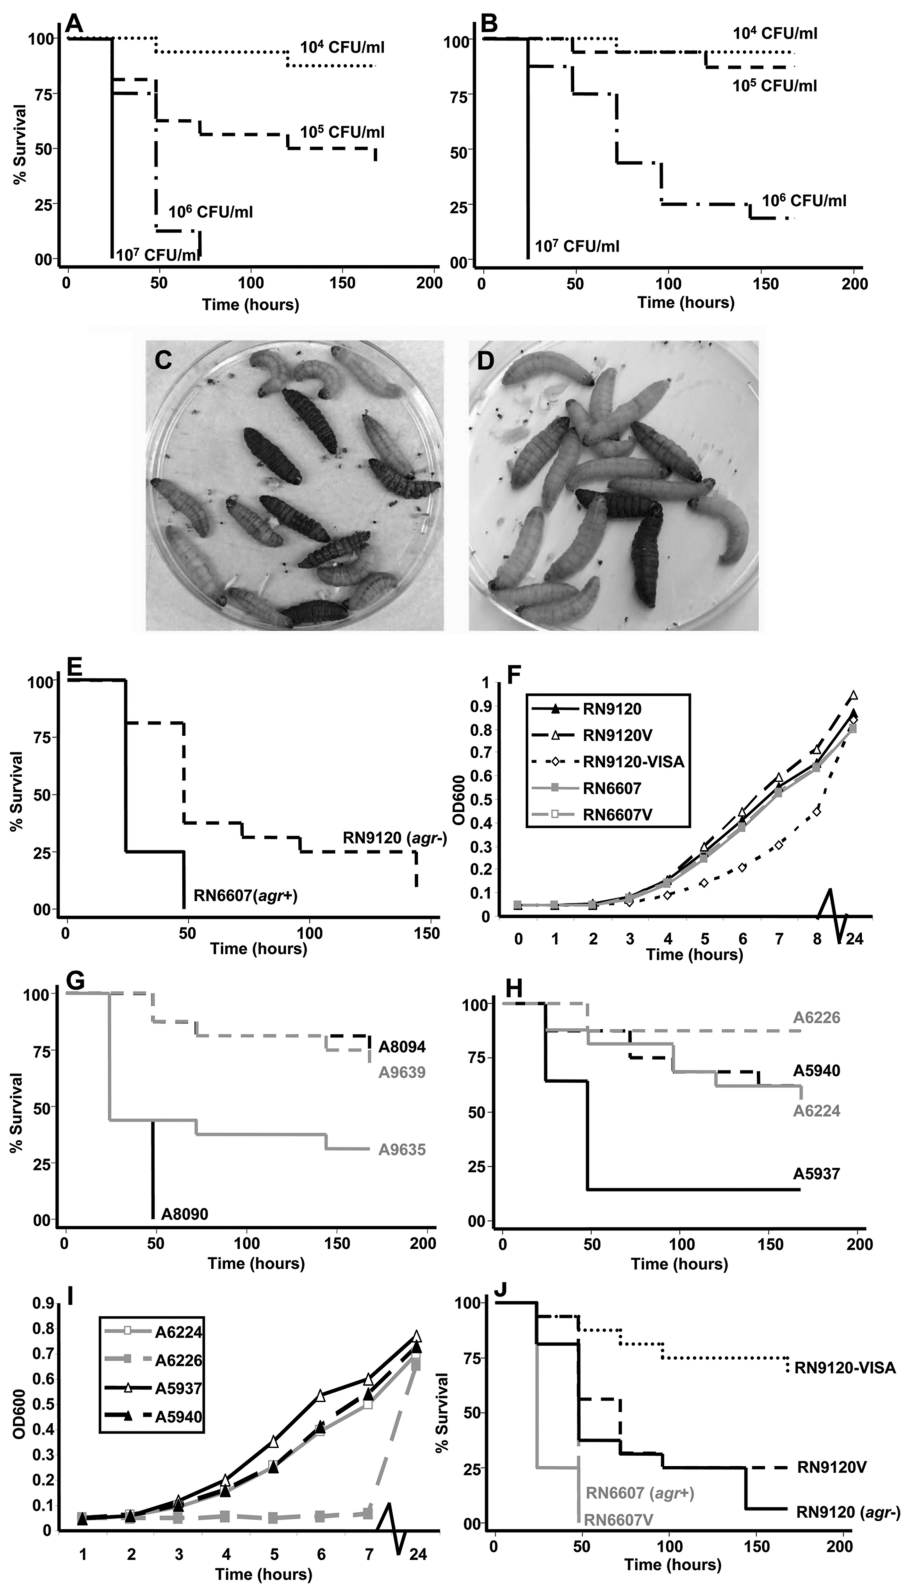

**Figure 2.** Effects of reduced susceptibility to vancomycin on the pathogenesis of *Staphylococcus aureus* infection in *Galleria mellonella*. The killing of *G. mellonella* was dependent on the injected *S. aureus* inoculum and the temperature of incubation, with greater killing observed at 37°C (A) than at 30°C (B). Progressive melanization of *G. mellonella* was evident after *S. aureus* infection (C and D) and was more profound in a vancomycin-susceptible strain (A8090) (C) than in its vancomycin-nonsusceptible derivative (A8094) (D) at the same time point (18 h). A *S. aureus* accessory gene regulator (*agr*) knockout mutant (RN9120) caused significantly less killing than its isogenic parent strain (RN6607) ( $P < .001$ ) (E). Growth kinetics of the laboratory strains RN6607 and RN9120 and their vancomycin-exposed derivatives were measured by optical density at 600 nm (OD<sub>600</sub>) (F). The killing of *G. mellonella* was significantly attenuated after infection with a vancomycin-nonsusceptible *S. aureus* strain compared with an isogenic, vancomycin-susceptible progenitor strain (for A8094 vs. A8090,  $P < .001$ ; for A9639 vs. A9635,  $P < .05$ ; for A5940 vs. A5937,  $P < .01$ ; for A6226 vs. A6224,  $P < .05$ ) (G and H). The growth kinetics of clinical pairs A6224/A6226 and A5937/A5940 were measured by OD<sub>600</sub> (I). Infection of *G. mellonella* with laboratory strains of *S. aureus* that were exposed to vancomycin showed that derivatives of the *agr*<sup>-</sup> mutant (RN9120V and RN9120-VISA) were significantly attenuated in their killing compared with the derivative of the *agr*<sup>+</sup> strain (RN6607V) ( $P < .01$ ) (J). In an *agr*<sup>-</sup> background (RN9120), attenuation of virulence was correlated with the vancomycin MIC.

**Figure 3.** Growth kinetics of clinical *Staphylococcus aureus* pairs A8090/A8094 and A9635/A9639.

difference in killing was proportional to the difference in the vancomycin MIC. For example, the pair A8090/A8094 (1 and 8  $\mu\text{g/mL}$ , respectively) showed the greatest difference in *G. mellonella* killing between the susceptible and resistant isolates (figure 2G). The attenuation in *G. mellonella* killing by the less susceptible of each clinical pair was similar whether the initial progenitor strain was methicillin susceptible (A9635) or methicillin resistant (all others). The functional *agr* activity for each strain is shown in table 1.

Given the known association between slower growth kinetics and the hVISA/VISA phenotype [13], we assessed the growth rates of all included strains. At 24 h, all pairs reached a similar  $\text{OD}_{600}$  value (figures 2I and 3). Interestingly, the pair with the greatest difference in growth at earlier time points (A6224/A6226) (figure 2I) had the smallest difference in killing between the susceptible and nonsusceptible strains (figure 2H). Moreover, a pair that had similar growth over 24 h (A5937/A5940) (figure 2I) exhibited a larger difference in killing (figure 2H). Moreover, in contrast to A5937 (susceptible progenitor), A5940 had evidence of *agr* dysfunction, providing further support that *agr* dysfunction significantly attenuates virulence without necessarily affecting the growth of *S. aureus* in vitro.

To confirm our observations using paired clinical isolates, we assessed the effects of laboratory derived hVISA/VISA strains in the *G. mellonella* infection model. This allowed control of both antibiotic exposure (vancomycin only) and *agr* function. As has been shown previously, the vancomycin MIC increases significantly more with an *agr* knockout mutant (RN9120, RN9120V, and RN9120-VISA) than with its parent strain (RN6607 and RN6607V) during in vitro vancomycin exposure (table 1) [7]. When inoculated into *G. mellonella*, the attenuation in virulence was significantly more pronounced in the derivatives of the *agr* knockout strain (RN9120V and RN9120-VISA) than in its vancomycin-exposed *agr*<sup>+</sup> parent (RN6607V) (figure 2J). Similar to what we observed using the clinical strains, as the vancomycin MIC increased (RN9120 to RN9120-VISA), the degree of *G. mellonella* killing significantly decreased ( $P < .001$ ) (figure 2J). Thus, these experiments support a role for both *agr* functional status and for vancomycin MIC as correlates of *S. aureus* virulence in *G. mellonella*. At 24 h, all vancomycin-exposed laboratory strains had a similar  $\text{OD}_{600}$  value (figure 2F).

**Discussion.** This report describes, for the first time, the utility of the greater wax moth, *G. mellonella*, as a model to study the virulence of *S. aureus*. Using both clinical and laboratory strains, we have demonstrated that with the evolution of reduced susceptibility to vancomycin, the virulence of *S. aureus* becomes

attenuated. The degree to which virulence is attenuated appears to be proportional to the vancomycin MIC.

The mechanism of this attenuation in virulence is likely multifactorial. First, as our results show, functional loss of the *agr* global regulator is associated with impaired virulence in the *G. mellonella* model. The *agr* locus of *S. aureus* is a quorum-sensing gene cluster that up-regulates production of secreted virulence factors, including the  $\alpha$ -,  $\beta$ -, and  $\delta$ -hemolysins [4], and has been shown to be important for *S. aureus* virulence in mammals [12]. Furthermore, the association between loss of *agr* function and reduced susceptibility to vancomycin in *S. aureus* has now been well described [4]. The *G. mellonella* survival curve analysis of pairs A5937/A5940 (figure 2H) and RN6607/RN9120 (figure 2E), all of which had very similar growth kinetics, strongly supports a role for *agr* dysfunction in attenuating virulence in *S. aureus*. However, the progenitor strains from the other clinical pairs had evidence of impaired *agr* function (table 1). Thus, apart from *agr*, other genes that may affect *S. aureus* virulence are likely involved in the genetic evolution of the hVISA/VISA phenotype, and these may include mutations in *vraSR* and *graR* [14].

We also demonstrated that some *S. aureus* strains that are less susceptible to vancomycin have impaired growth during the first few hours of incubation. The structural and metabolic changes associated with the development of a hVISA/VISA strain are probably costly to *S. aureus* fitness. However, although slower growth may contribute to attenuated virulence, it is clear from our findings that it is not the full explanation. More specifically, the clinical pair with the greatest difference in growth kinetics (A6224/A6226) had the smallest difference in killing of *G. mellonella*, and, conversely, the pair with minimal difference in growth (A5937/A5940) had larger differences in *G. mellonella* killing (figure 2H and 2I).

To date, the mechanism of *G. mellonella* killing by *S. aureus* is unknown. The insect has cellular and humoral immune response pathways that are mediated by hemocytes and antimicrobial peptides, respectively. Interestingly, in preliminary experiments, we observed a higher staphylococcal burden in tissue at 8 h after inoculation for the more pathogenic A8090 strain than for its less pathogenic pair (A8094), suggesting that host immune responses are probably important for the differences in *G. mellonella* killing by *S. aureus*. Further research on host response is ongoing.

In conclusion, we have demonstrated the utility of the non-mammalian model system, *G. mellonella*, for assessing the virulence of *S. aureus*. Using an *agr* knockout mutant, we have shown an important correlation between the pathogenesis of *S. aureus* infection in *G. mellonella* and that seen in mammalian models. Finally, in all strains studied that have developed the hVISA/VISA phenotype, either in vitro or in clinical circumstances, virulence toward *G. mellonella* is attenuated as the vancomycin MIC increases.

## References

1. Howden BP, Ward PB, Charles PG, et al. Treatment outcomes for serious infections caused by methicillin-resistant *Staphylococcus aureus* with reduced vancomycin susceptibility. *Clin Infect Dis* **2004**; 38:521–8.
2. Hiramatsu K, Aritaka N, Hanaki H, et al. Dissemination in Japanese hospitals of strains of *Staphylococcus aureus* heterogeneously resistant to vancomycin. *Lancet* **1997**; 350:1670–3.
3. Mwangi MM, Wu SW, Zhou Y, et al. Tracking the in vivo evolution of multidrug resistance in *Staphylococcus aureus* by whole-genome sequencing. *Proc Natl Acad Sci USA* **2007**; 104:9451–6.
4. Sakoulas G, Eliopoulos GM, Moellering RC Jr, et al. Accessory gene regulator (*agr*) locus in geographically diverse *Staphylococcus aureus* isolates with reduced susceptibility to vancomycin. *Antimicrob Agents Chemother* **2002**; 46:1492–502.
5. Charles PG, Ward PB, Johnson PD, Howden BP, Grayson ML. Clinical features associated with bacteremia due to heterogeneous vancomycin-intermediate *Staphylococcus aureus*. *Clin Infect Dis* **2004**; 38:448–51.
6. Soriano A, Marco F, Martinez JA, et al. Influence of vancomycin minimum inhibitory concentration on the treatment of methicillin-resistant *Staphylococcus aureus* bacteremia. *Clin Infect Dis* **2008**; 46:193–200.
7. Sakoulas G, Eliopoulos GM, Fowler VG Jr, et al. Reduced susceptibility of *Staphylococcus aureus* to vancomycin and platelet microbicidal protein correlates with defective autolysis and loss of accessory gene regulator (*agr*) function. *Antimicrob Agents Chemother* **2005**; 49:2687–92.
8. Aperis G, Fuchs BB, Anderson CA, Warner JE, Calderwood SB, Mylonakis E. *Galleria mellonella* as a model host to study infection by the *Francisella tularensis* live vaccine strain. *Microbes Infect* **2007**; 9:729–34.
9. Mylonakis E, Moreno R, El Khoury JB, et al. *Galleria mellonella* as a model system to study *Cryptococcus neoformans* pathogenesis. *Infect Immun* **2005**; 73:3842–50.
10. Jander G, Rahme LG, Ausubel FM. Positive correlation between virulence of *Pseudomonas aeruginosa* mutants in mice and insects. *J Bacteriol* **2000**; 182:3843–5.
11. Lyon GJ, Mayville P, Muir TW, Novick RP. Rational design of a global inhibitor of the virulence response in *Staphylococcus aureus*, based in part on localization of the site of inhibition to the receptor-histidine kinase, AgrC. *Proc Natl Acad Sci USA* **2000**; 97:13330–5.
12. Abdelnour A, Arvidson S, Bremell T, Ryden C, Tarkowski A. The accessory gene regulator (*agr*) controls *Staphylococcus aureus* virulence in a murine arthritis model. *Infect Immun* **1993**; 61:3879–85.
13. Sieradzki K, Leski T, Dick J, Borio L, Tomasz A. Evolution of a vancomycin-intermediate *Staphylococcus aureus* strain in vivo: multiple changes in the antibiotic resistance phenotypes of a single lineage of methicillin-resistant *S. aureus* under the impact of antibiotics administered for chemotherapy. *J Clin Microbiol* **2003**; 41:1687–93.
14. Neoh HM, Cui L, Yuzawa H, Takeuchi F, Matsuo M, Hiramatsu K. Mutated response regulator *graR* is responsible for phenotypic conversion of *Staphylococcus aureus* from heterogeneous vancomycin-intermediate resistance to vancomycin-intermediate resistance. *Antimicrob Agents Chemother* **2008**; 52:45–53.
